# Supplementary material for: A live-cell image-based machine learning strategy for reducing variability in PSC differentiation systems
Source: PubMed Central journal article supplement (PMC10244346; doi:10.1038/s41421-023-00543-1), 2023-06-06
Supplement: 41421_2023_543_MOESM1_ESM.pdf [file 41421_2023_543_MOESM1_ESM.pdf]

## **Supplementary Information**

### **A live-cell image-based machine learning strategy for reducing variability in PSC differentiation systems**

Xiaochun Yang, Daichao Chen, Qiushi Sun, Yao Wang, Yu Xia, Jinyu Yang, Chang Lin, Xin Dang, Zimu Cen, Dongdong Liang, Rong Wei, Ze Xu, Guangyin Xi, Gang Xue, Can Ye, Li-Peng Wang, Peng Zou, Shi-Qiang Wang, Pablo Rivera-Fuentes, Salome Püntener, Zhixing Chen, Yi Liu, Jue Zhang, Yang Zhao

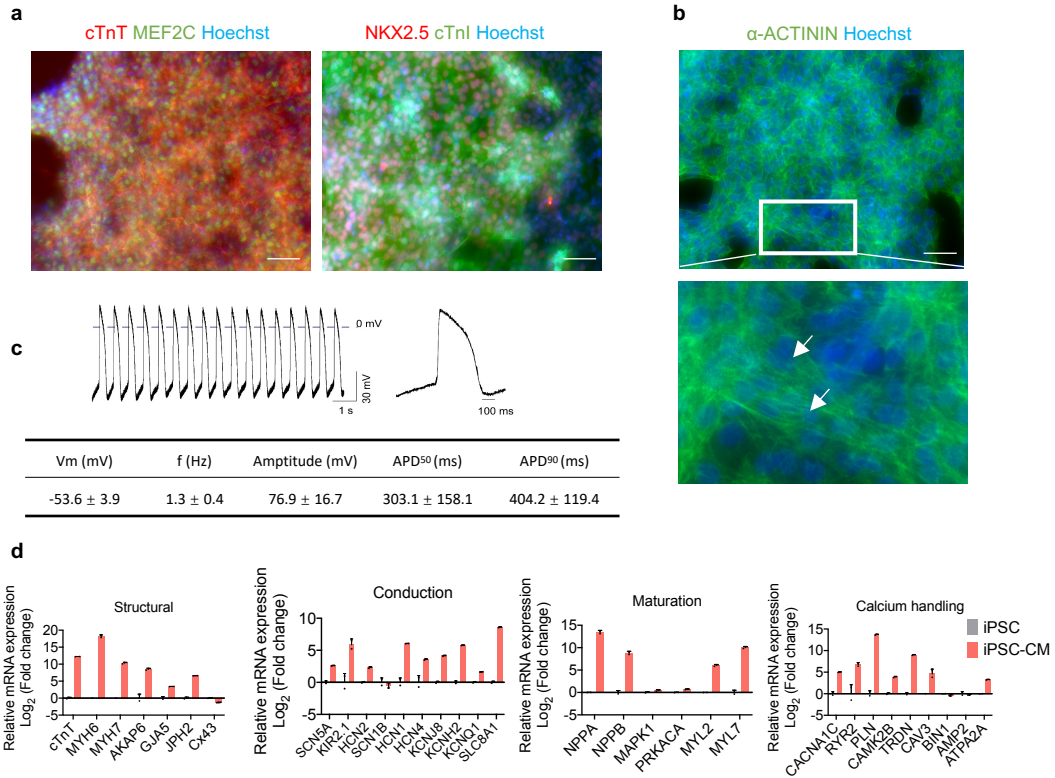

**Supplementary Fig. S1 Characterization of PSC-CMs.**

**a** Representative Immunofluorescent images of PSC-CM for cTnT, MEF2C, NKX2.5, and cTnI on day 12. Scale bar, 100 μm.

**b** Representative Immunofluorescent images of PSC-CM for α-ACTININ on day 12. Arrows show the sarcomere structures indicated by α-ACTININ staining. Scale bar, 100 μm.

**c** Representative recordings of spontaneous action potentials in single PSC-CMs on day 15. Summarized data on resting potential (V<sub>m</sub>), frequency (f), action potential amplitude, and action potential duration at 50% of the amplitude (APD<sub>50</sub>) and 90% of the amplitude (APD<sub>90</sub>). Data were mean ± SD. *n* = 4.

**d** RT-PCR analysis of cardiac gene expression for PSC-CM (day 15, after purification) compared with iPSC. *n* = 3.

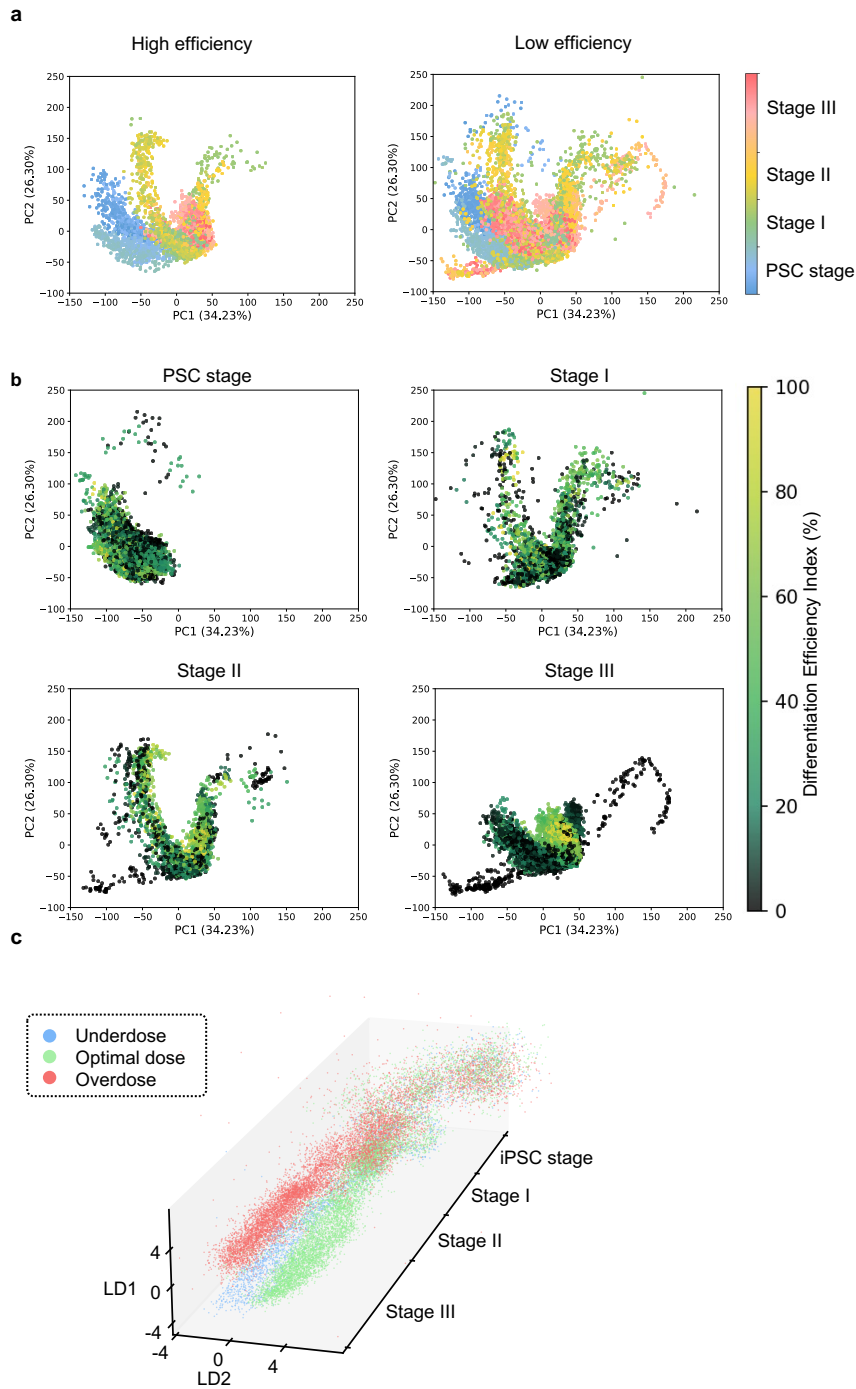

**Supplementary Fig. S2 Visualization of local bright-field image features of the whole PSC-to-CM differentiation process.**

**a** PCA of local bright-field image features of high-efficiency wells (Normalized Differentiation Efficiency Index  $\geq 50\%$ ,  $n = 5200$  images) and low-efficiency wells (Normalized Differentiation Efficiency Index  $< 50\%$ ,  $n = 14,768$  images). The bright-field image of each well at a certain time point was represented by a 448-D texture feature vector and projected to the 2-D plane spanned by the first two principal components (PC1 and PC2). Colors represent the time points in the differentiation process. The Differentiation Efficiency Index was normalized between 0 and 100%.

**b** PCA of local bright-field image features at PSC stage, stage I, stage II, and stage III. The color of the dots represents the Differentiation Efficiency Index, which was normalized between 0 and 100%.  $n = 19,968$  images.

**c** LDA of local bright-field image features. The axis of the 3-D plot represents the time axis and the first two linear discriminants (LD1 and LD2).  $n = 19,968$  images.

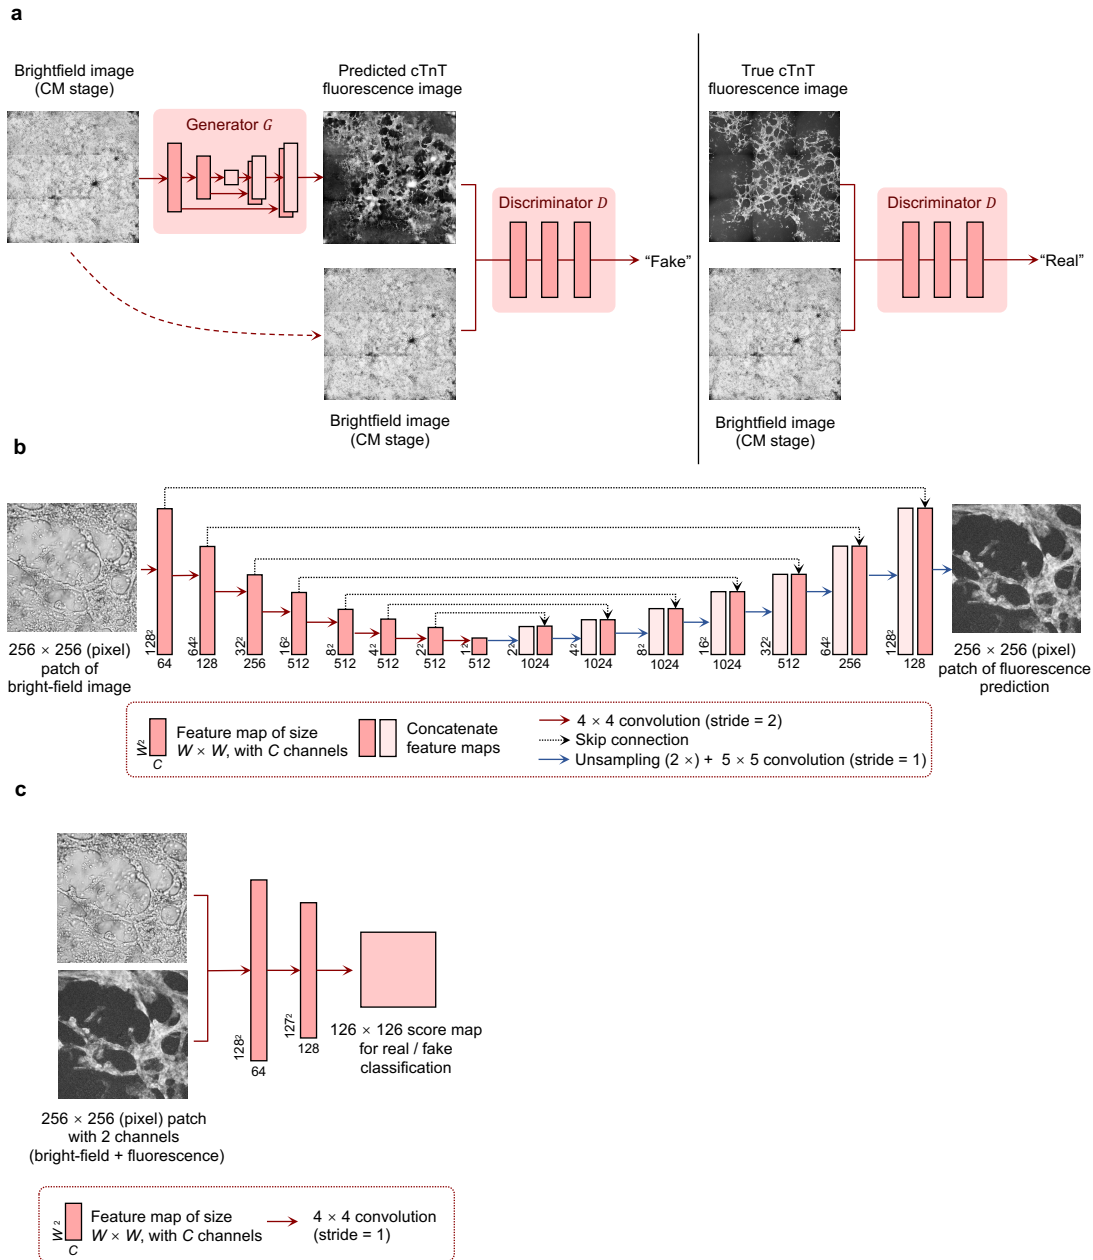

**Supplementary Fig. S3 Schematic overview of deep learning-based cTnT fluorescence prediction on live-cell bright-field images at CM stage.**

**a** Training the pix2pix model for brightfield-to-fluorescence image translation. The generator  $G$  learns to predict fluorescent labels from brightfield images, while the discriminator  $D$  learns to distinguish between true and fake “brightfield-fluorescence” image pairs.

**b** Detailed architecture of the generator. The generator  $G$  is a U-Net with 8 convolutional layers in both the encoder and decoder parts. All the inner convolutional layers are followed by Instance Normalization and ReLU activation. The transposed convolution in the original design was replaced with nearest neighbor up-sampling followed by 5 × 5 convolution.

**c** Detailed architecture of the discriminator. The discriminator  $D$  is a 3-layer convolutional neural network. Each pixel in the network output has a receptive field of size 16 × 16, representing the real/fake classification score for the corresponding 16 × 16 patches.

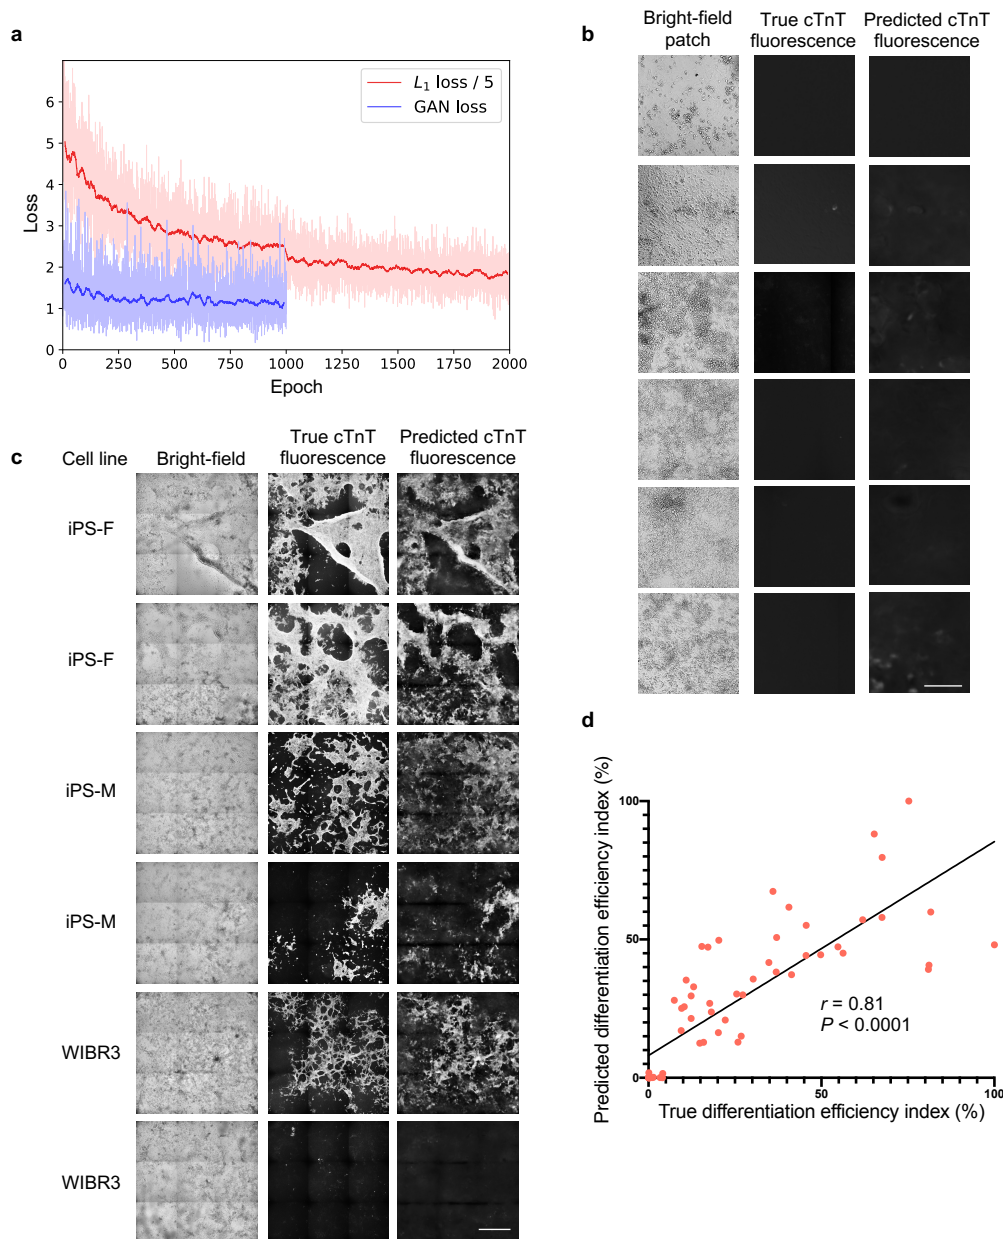

**Supplementary Fig. S4 Performance of deep learning-based cTnT fluorescence prediction on live-cell bright-field images at CM stage.**

**a** Change of  $L_1$  loss and GAN loss of the U-Net generator in the pix2pix model during training. The  $L_1$  loss is scaled by 1/5. The dark lines are the corresponding smoothed curves using 20-epoch moving average. The U-Net generator was trained with  $L_1$  loss and GAN loss in the first 1000 epochs, while only trained with  $L_1$  loss in the last 1000 epochs to ensure fidelity of fluorescence prediction.

**b** Typical prediction results of CM recognition on bright-field image patches (barely containing cTnT<sup>+</sup> CMs) from the test dataset. Each column from left to right represents: live-cell bright-field image patch; true cTnT fluorescence result; predicted cTnT fluorescence result. Scale bar, 250  $\mu$ m.

**c** Typical prediction results of CM recognition on a new dataset from three additional cell lines (iPS-F, iPS-M, and WIBR3). Each column from left to right represents: live-cell bright-field image; true cTnT fluorescence result; predicted cTnT fluorescence result. Scale bar, 1 mm.

**d** Correlation between the true and predicted Differentiation Efficiency Indexes on a new dataset from three additional cell lines (iPS-F, iPS-M, and WIBR3), with Pearson's  $r$  value. True and predicted Differentiation Efficiency Indexes were normalized between 0 and 100%.  $n = 62$  wells.

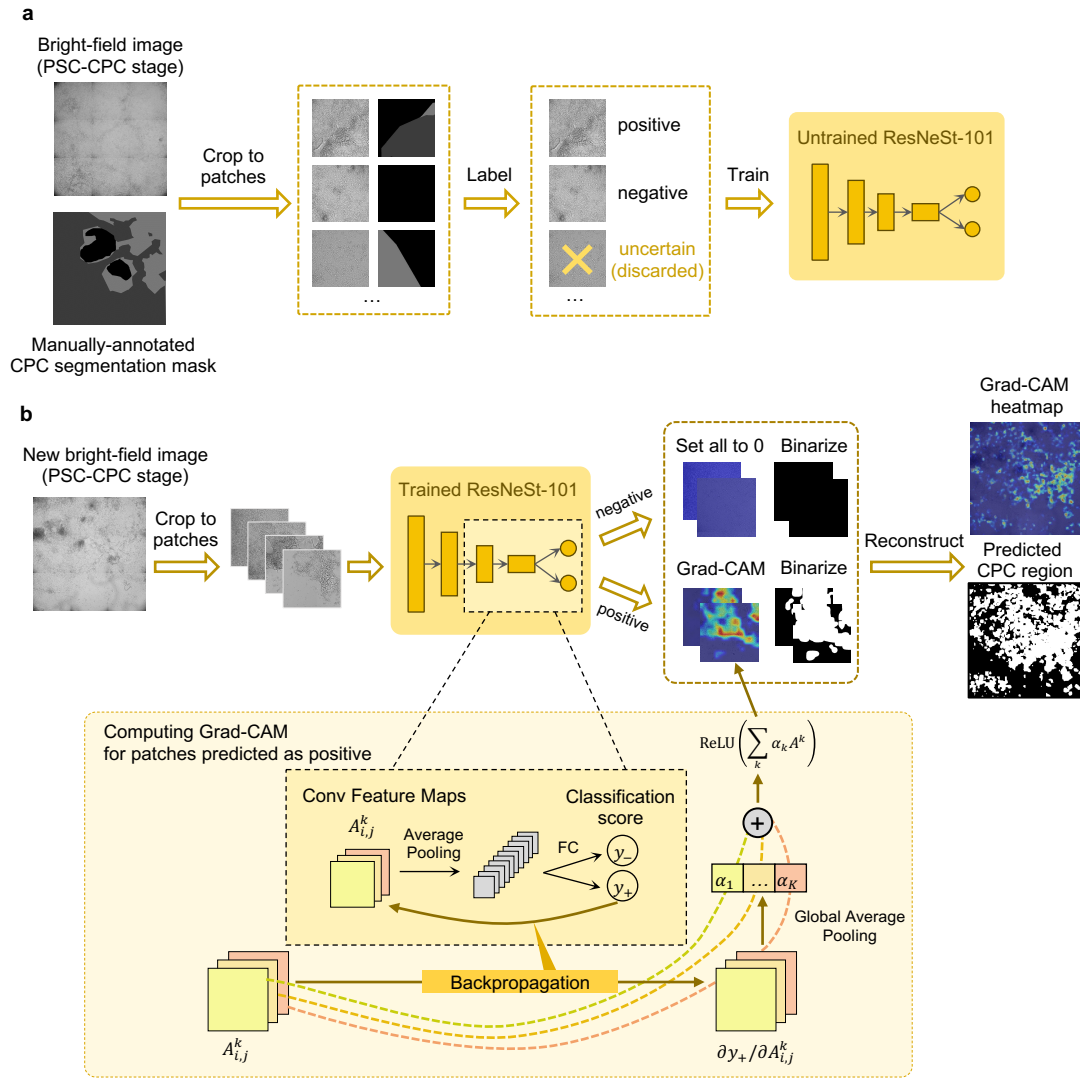

**Supplementary Fig. S5 Schematic overview of training and testing of the weakly supervised learning for CM-committed CPC recognition.**

**a** Schematic overview of the training stage. The ResNeSt-101 classification network was trained with bright-field patches labeled as positive or negative. The label of bright-field patches was derived from the manually annotated CPC segmentation masks, colored with dark grey, light gray, and black (Methods). The bright-field patches were labeled as “positive” or “negative”, or simply discarded according to the percentage of dark gray areas (Methods).

**b** Schematic overview of the test stage. Bright-field image patches were first classified using the trained ResNeSt: for patches predicted as “positive”, Grad-CAM was applied to generate a heatmap highlighting the regions important to the prediction; for patches predicted as “negative”, the heatmap was simply set to all-zero. Patch-level heatmaps and predicted CPC regions (by binarization) were finally reconstructed into whole-well predictions.

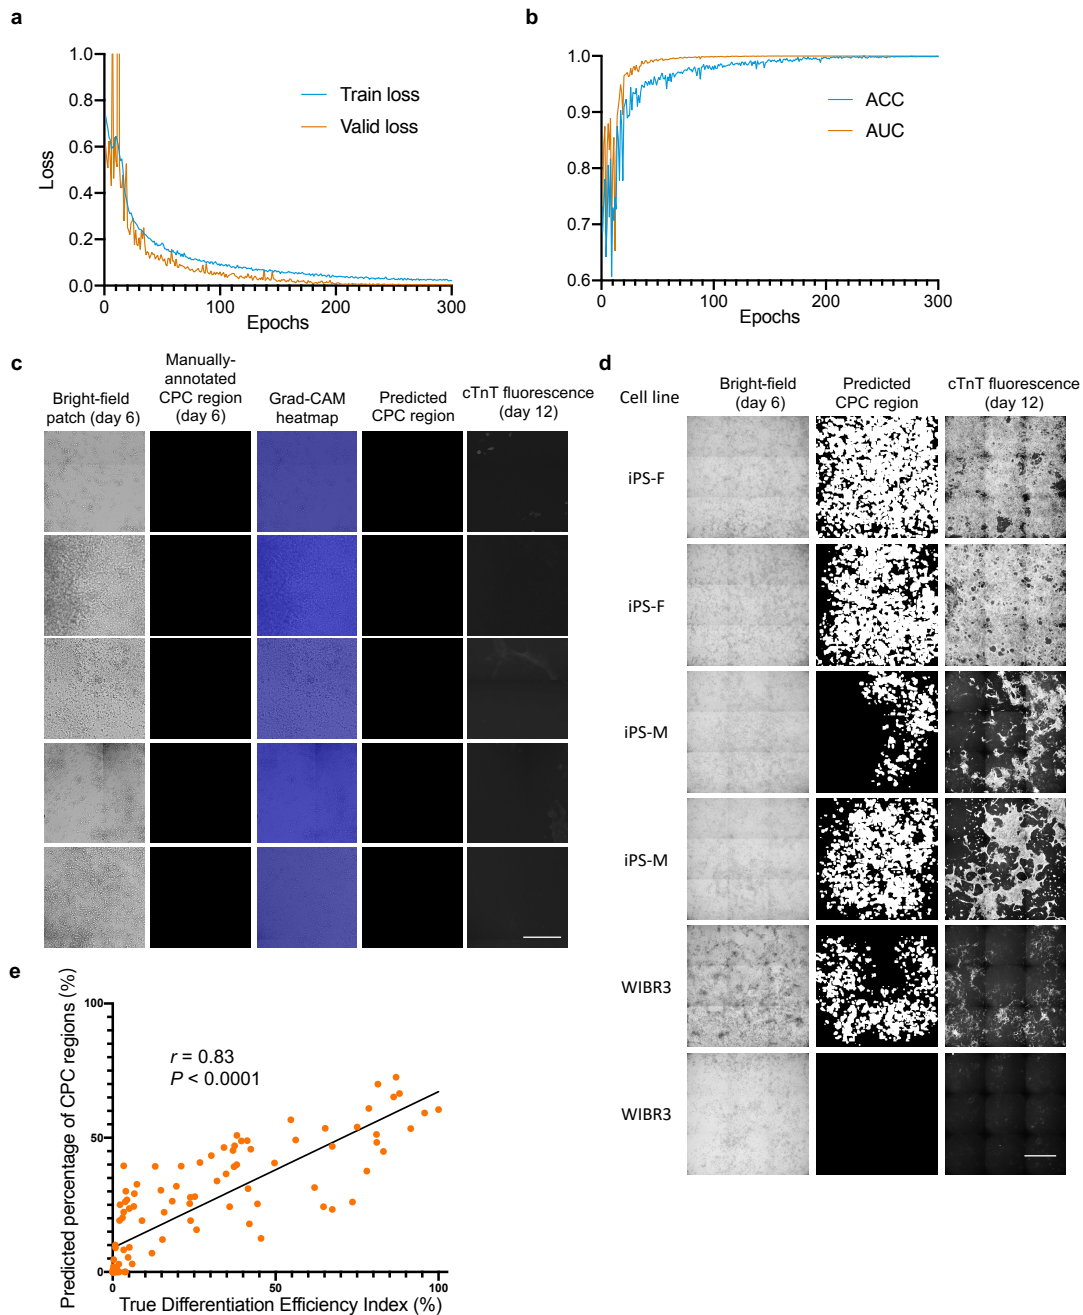

**Supplementary Fig. S6 Performance of CPC recognition using the weakly supervised learning on images of CPC stage.**

**a** Training loss and validation loss curves of the ResNeSt-101.

**b** Classification AUC and ACC curve of the ResNeSt-101.

**c** Typical prediction results of CPC recognition on the negative day 6 bright-field patches from the test set. Each column from left to right represents: live-cell bright-field image patch on day 6; manually annotated CPC regions; Grad-CAM heatmap for CPC localization; binary prediction result of CPC regions; true cTnT fluorescence result of day 12. Scale bar, 250  $\mu$ m.

**d** Typical prediction results of CPC recognition on a new dataset from three additional cell lines (iPS-F, iPS-M, and WIBR3). Each column from left to right represents: live-cell bright-field image on day 6; binary prediction result of CPC regions; true cTnT fluorescence result of day 12. Scale bar, 1mm.

**e** Correlation between the true Differentiation Efficiency Index (from day 12 cTnT fluorescence results) and the predicted percentage of CPC regions (from day 6 CPC bright-field images) on a new dataset from three additional cell lines (iPS-F, iPS-M, and WIBR3), with Pearson's  $r$  value. True Differentiation Efficiency Index was normalized between 0 and 100%.  $n = 103$  wells.

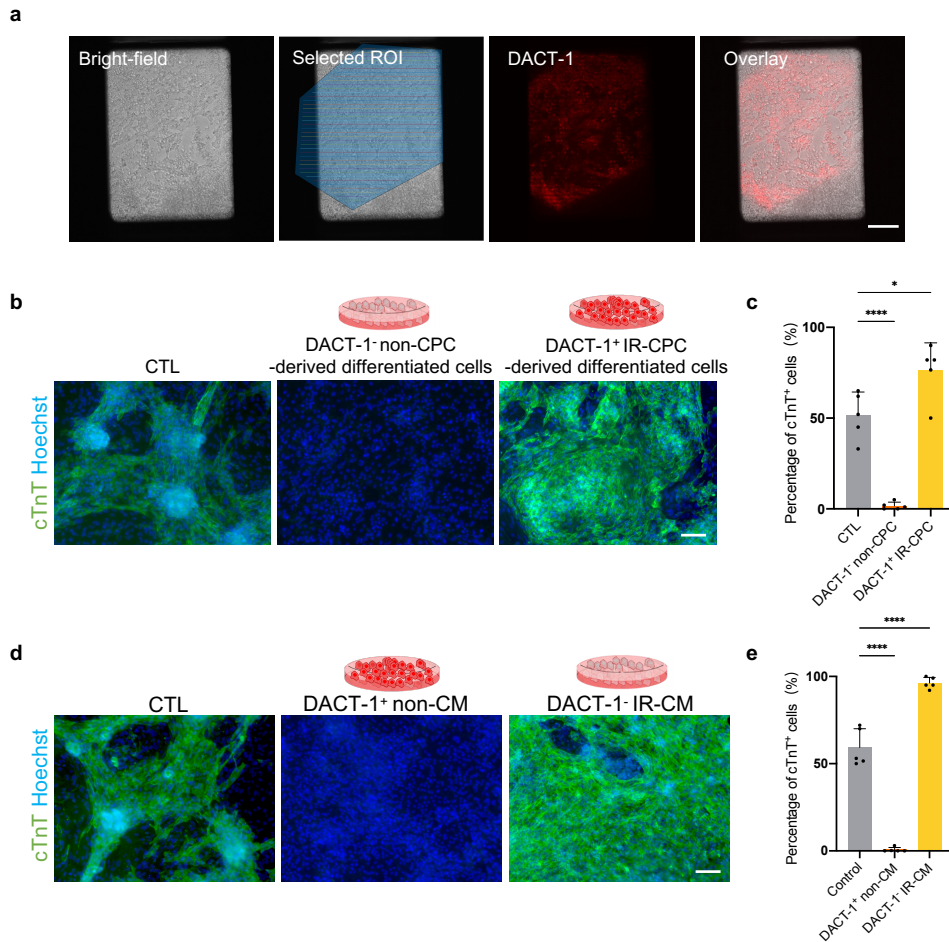

**Supplementary Fig. S7 Purification of IR-CPC and IR-CM assisted by DACT-1 and laser scanning microscope.**

**a** Effect of region-selective photoactivation using the ROI scanning mode. Images from left to right represent: live-cell bright-field image; selected ROI on bright-field for fluorescent labeling by 405 nm laser irradiating in which colored lines represent traces of violet light spot during ROI scanning; DACT-1-derived photoproduct in irradiated cell region detected in the 561 nm channel (red); the overlay of bright-field and 561 nm channel showing the positioning accuracy of fluorescent labeling. Scale bar, 100  $\mu$ m.

**b** Purification effect of day 6 IR-CPCs. After FACS, unlabeled non-CPCs, DACT-1 labeled IR-CPCs, and cells of the CTL group were subsequently cultured for 6 days in RPMI + B27 medium. The purity of subsequently differentiated CMs was identified by immunostaining of cTnT. All the cells were from the same batch and under the same differentiation condition. Scale bar, 100  $\mu$ m.

**c** Quantitative analysis of the percentage of cTnT<sup>+</sup> cells in (b). Data are mean  $\pm$  SD.  $n = 5$ . \*  $P < 0.05$ ; \*\*\*\*  $P < 0.0001$  by one-way ANOVA followed by Dunnett's multiple comparisons test.

**d** Purification effect of day 12 IR-CMs. After FACS, DACT-1 labeled non-CMs, unlabeled IR-CMs, and cells of the CTL group were subsequently cultured for 6 days in RPMI + B27 medium. The purity of CMs was identified by immunostaining of cTnT. All the cells were from the same batch under the same differentiation condition. Scale bar, 100  $\mu$ m.

**e** Quantitative analysis of the percentage of cTnT<sup>+</sup> cells in (d). Data are mean  $\pm$  SD.  $n = 5$ . \*\*\*\*  $P < 0.0001$  by one-way ANOVA followed by Dunnett's multiple comparisons test.



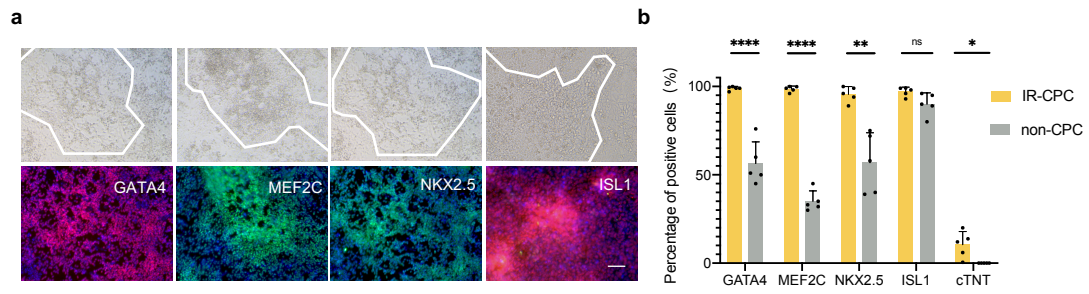

**Supplementary Fig. S8 Characterization of IR-CPCs identified by immunofluorescence.**

**a** Immunostaining of classical CPCs markers in the day 6 bright-field images. Cell regions with IR-CPC texture are in white frames. Scale bar, 100  $\mu$ m.

**b** Quantitative analysis of CPC markers' distribution in IR-CPC or non-CPC region for (a). Data are mean  $\pm$  SD.  $n = 5$ . Statistical significance was determined by  $t$ -test, \*  $P < 0.05$ , \*\*  $P < 0.01$ , \*\*\*\*  $P < 0.0001$ .

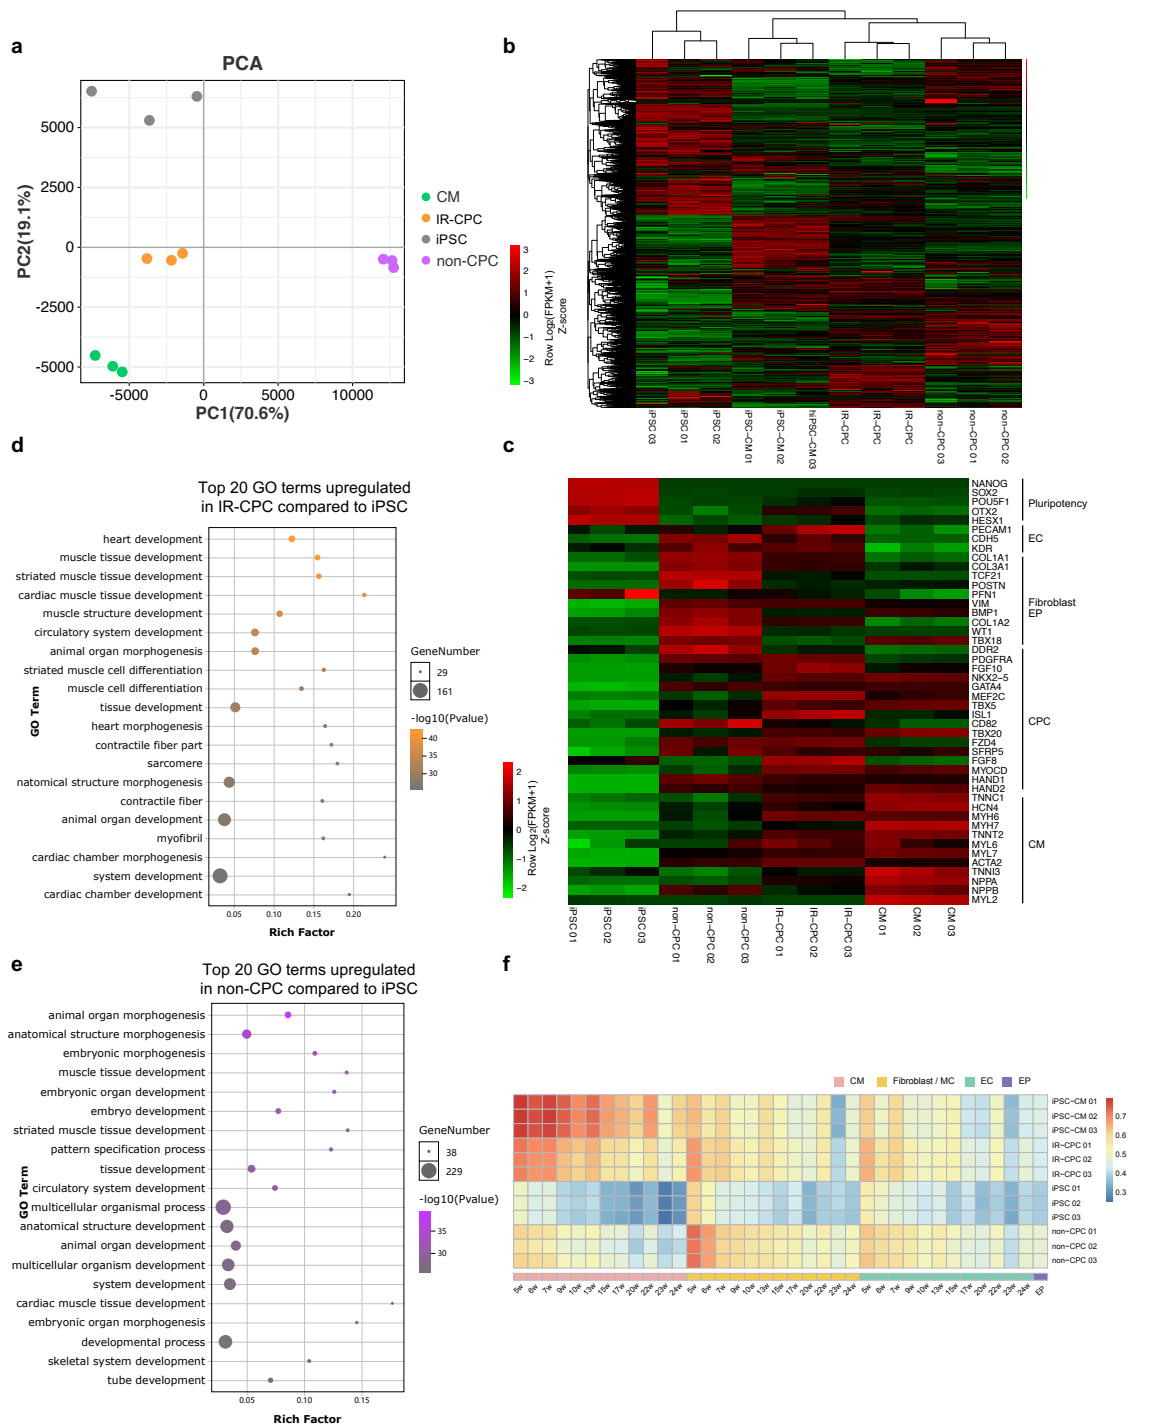

**Supplementary Fig. S9 Characterization of IR-CPCs identified by bulk RNA-seq.**

**a** PCA of bulk RNA-seq for iPSC, IR-CPC, non-CPC, and CM groups. Each point represents an RNA-seq sample.  $n = 3$ .

**b** Genome-wide comparison among iPSC, IR-CPC, non-CPC, and CM. Heatmap shows Z-scores of  $\log_2(\text{FPKM}+1)$  normalized over multiple samples. Hierarchical clustering was performed with 17,561 genes.

**c** Five separate gene clusters according to the different gene expression patterns in iPSC, IR-CPC, CM, and non-CPC. Bars on the right indicate identified lineages, including the pluripotent cell, endothelial cell (EC), fibroblast or epicardial cell (EP), CPC, and CM (from top to bottom). Heatmap shows Z-scores of  $\log_2(\text{FPKM}+1)$  normalized over multiple samples.

**d** Gene ontology (GO) enrichment analysis of DEGs on IR-CPC. The top 20 GO terms were enriched from the top 500 DEGs upregulated in IR-CPC compared to iPSC, most of which related to heart and cardiac muscle development.

**e** GO enrichment analysis of DEGs on non-CPC. Top 20 GO terms of top 500 genes upregulated in non-CPC compared to iPSC related to multiple tissue development.

**f** Comparison of cell types between single-cell RNA-seq data of human fetal heart development (column) and our bulk RNA-seq data (row). The correlation was calculated by applying the Spearman method. Four main cell types were retained for comparison: CM, fibroblast/mesenchymal cell (MC), EC, and EP. The week is denoted as "W". Color bar represents different cell types.

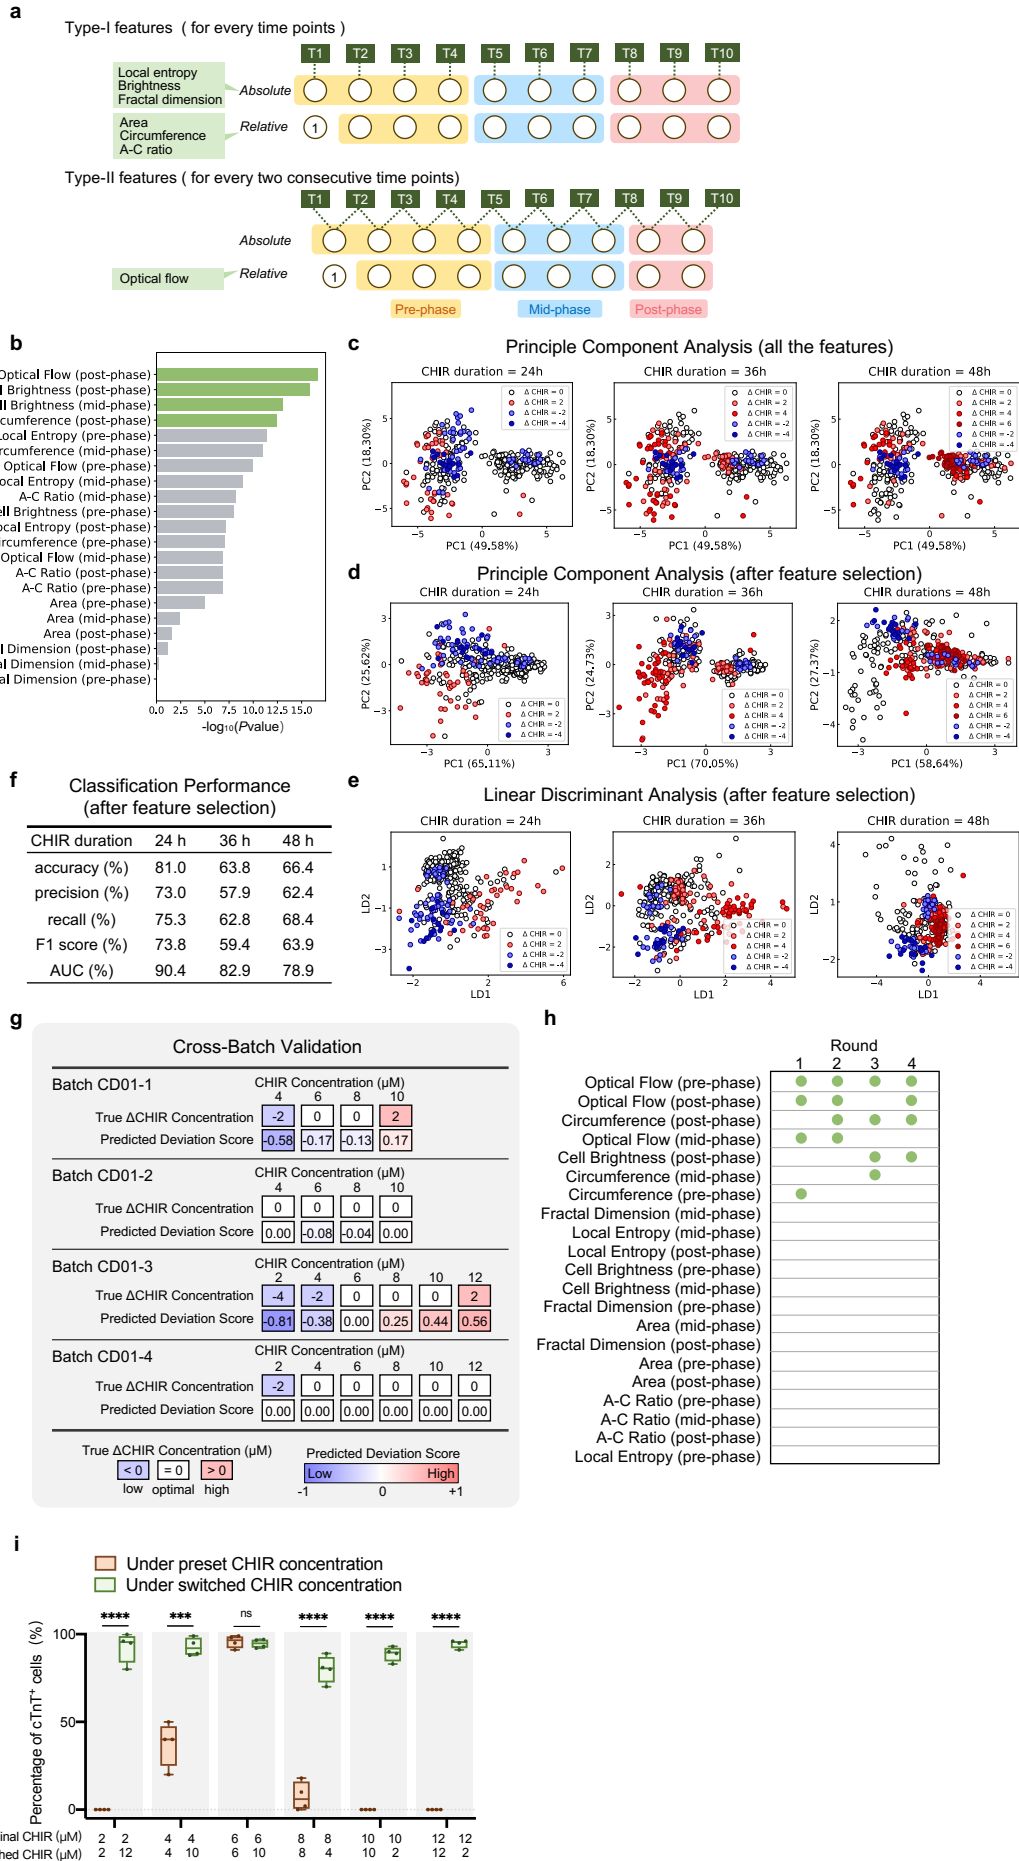

**Supplementary Fig. S10 Feature design and performance of assessment on the CHIR dose.**

**a** Schematic of feature extraction. The 0–12 h image streams consisted of 10 uniformly-taken bright-field images (denoted by T1, T2, ..., T10). The features are computed at every time point (for type-I features) or at every two consecutive time points (for type-II features). Relative features are normalized by T1 baselines. For each feature, the mean value in the pre-phase, mid-phase, and post-phase are used. Therefore, three numbers are obtained for each of the seven features, resulting in a 21-D feature representation.

**b** Importance weights of the 21 features. Wells were labeled as low, optimal, and high under a CHIR duration of 24 h. One-way ANOVA was conducted on the training set ( $n = 268$  wells), yielding a  $P$ value for each feature.

**c** PCA of 0–12h image streams represented by 21 features.  $n = 384$  wells.

**d** PCA of 0–12h image streams represented by the four selected features.  $n = 384$  wells.

**e** LDA of 0–12h image streams represented by the four selected features.  $n = 384$  wells.

**f** Classification performance of the logistic regression model using the four selected features on the test set.  $n = 116$  wells.

**g** Detailed results of the cross-batch validation (under a CHIR duration of 24 h). In each train-test round, one of the four batches was selected for testing while the other 3 batches were for training. The predicted Deviation Scores, with true CHIR concentration labels, were provided.

**h** Features selected in each round of cross-batch validation. Green dots represent the top four features with the most important weights in each round.

**i** Effects of switching CHIR concentration. For each well, the preset CHIR concentration was maintained or switched to a more suitable condition at 24 h. The percentage of cTnT<sup>+</sup> cells for wells under a preset CHIR concentration and under an optimized CHIR concentration was shown (CHIR duration = 48 h).

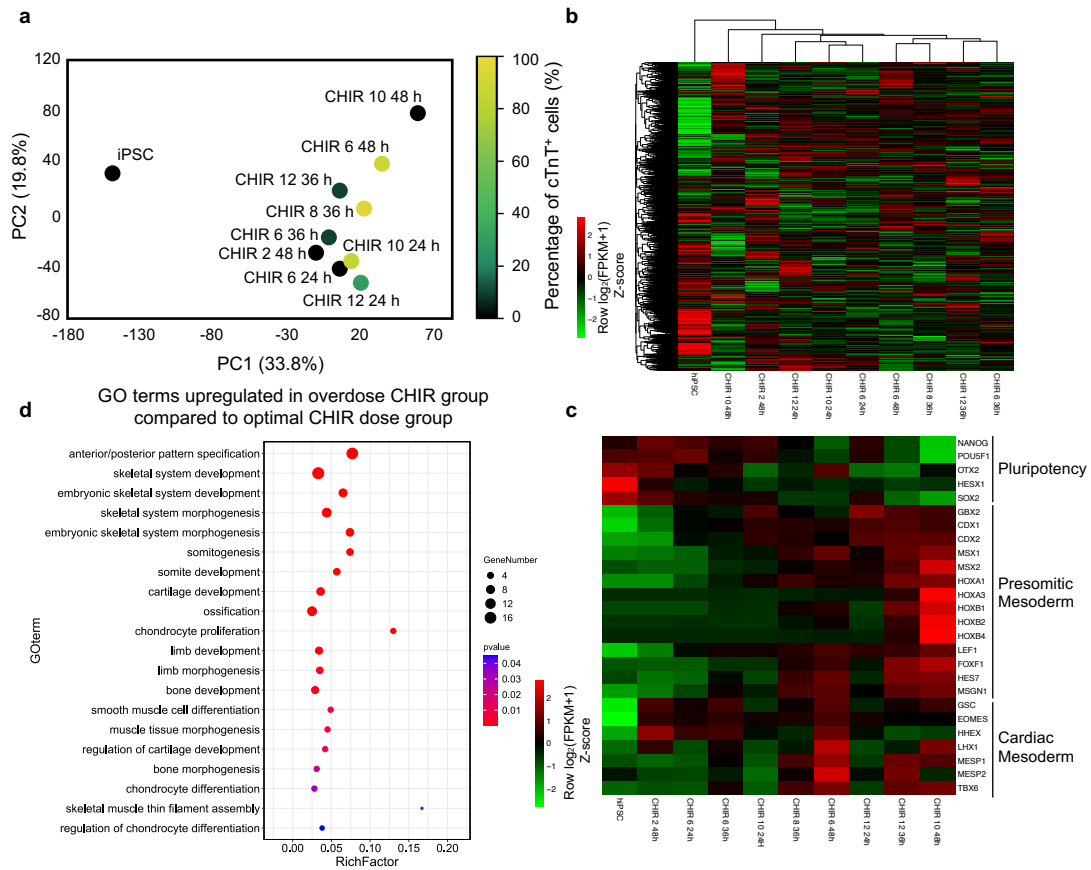

**Supplementary Fig. S11 Identification of cell response to different CHIR doses by bulk RNA-seq.**

**a** PCA of bulk RNA-seq for different CHIR doses. Sequencing samples were collected at stage I of differentiation. For each CHIR dose, average CM differentiation efficiency was quantified from the day 12 cTnT immunofluorescence results ( $n = 5$ ). Sequencing samples and the samples staining for cTnT were from the same batch to avoid CHIR fluctuation.

**b** Genome-wide comparison among the samples treated with different CHIR doses. Heatmap shows Z-scores of  $\log_2(\text{FPKM}+1)$  normalized over multiple samples. Hierarchical clustering was performed with 16,220 genes.

**c** Different mesodermal fates under different CHIR doses revealed by RNA-seq. Heatmap shows Z-scores of  $\log_2(\text{FPKM}+1)$  normalized over multiple samples.

**d** GO enrichment analysis of up-regulated genes in overdose CHIR (10  $\mu\text{M}$  48 h) treatment compared with optimum CHIR dose (6  $\mu\text{M}$  48 h). 20 GO terms related to somitogenesis and anterior/posterior pattern specification were enriched.

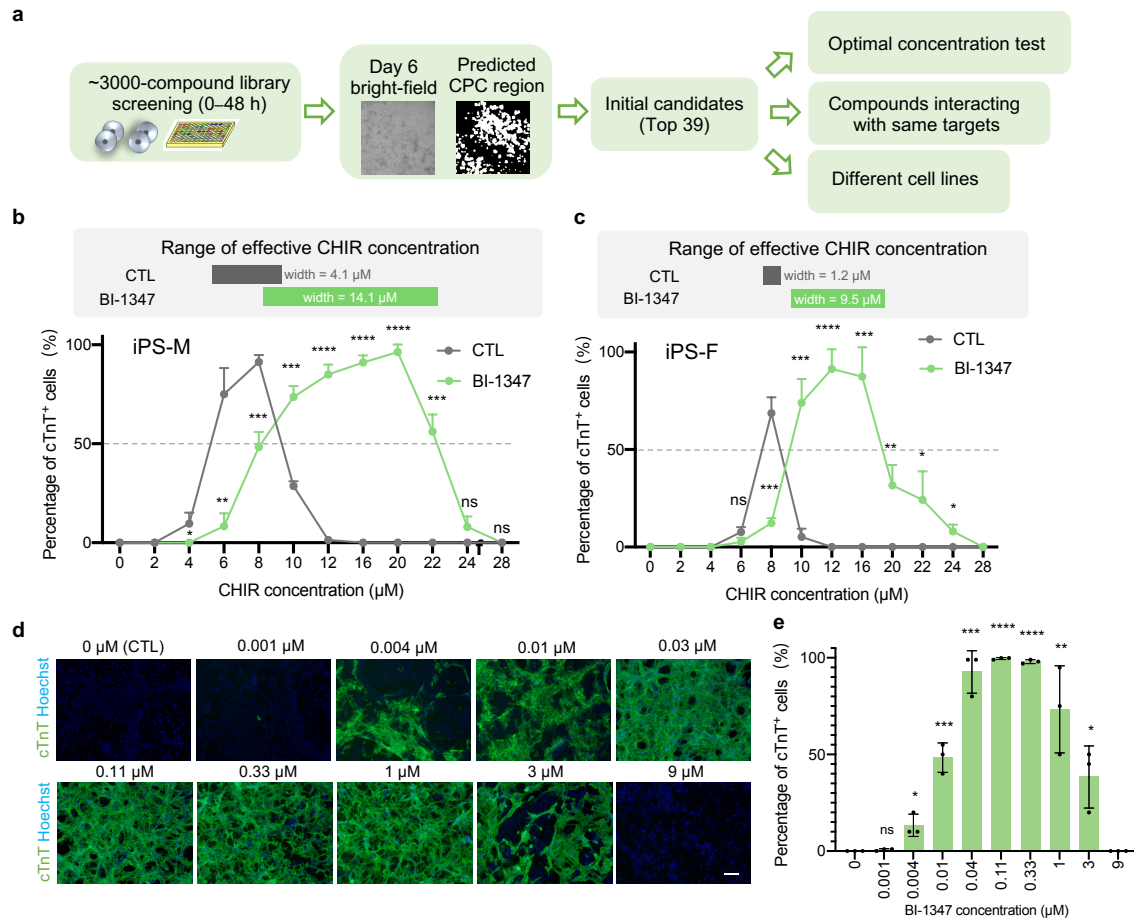

**Supplementary Fig. S12 Image-based small molecule screening and verification of BI-1347.**

**a** Workflow of the small molecule screening. iPS-B1 cell line was used for the preliminary screening.

**b** Effect of BI-1347 (0.5  $\mu\text{M}$ , 48 h) on the iPS-M cell line. The widths of effective CHIR concentration (percentage of cTnT<sup>+</sup> cells  $\geq$  50%, indicates by a dash line) were shown in the upper panel. Data are mean  $\pm$  SD.  $n = 3$ . Statistical significance was determined by *t*-test under each CHIR concentration. \*  $P < 0.05$ , \*\*  $P < 0.01$ , \*\*\*  $P < 0.001$ , \*\*\*\*  $P < 0.0001$ ; ns, not significant.

**c** Effect of BI-1347 (0.5  $\mu\text{M}$ , 48 h) on the iPS-F cell line. The widths of effective CHIR concentration (percentage of cTnT<sup>+</sup> cells  $\geq$  50%, indicates by a dash line) were shown in the upper panel. Data are mean  $\pm$  SD.  $n = 3$ . Statistical significance was determined by *t*-test under each CHIR concentration. \*  $P < 0.05$ , \*\*  $P < 0.01$ , \*\*\*  $P < 0.001$ , \*\*\*\*  $P < 0.0001$ ; ns, not significant.

**d** Effect of different concentrations of BI-1347 on improving differentiation efficiency under high CHIR dose (16  $\mu\text{M}$ , 48 h). Representative immunofluorescent images of cTnT (green) and Hoechst (blue) on day 12 were shown. Scale bar, 100  $\mu\text{m}$ .

**e** Effect of different BI-1347 concentrations on cardiac differentiation efficiency under high CHIR dose (16  $\mu\text{M}$ , 48 h). iPSC was treated with BI-1347 during 0–48 h. Data are mean  $\pm$  SD.  $n = 3$ . Statistical significance was determined by *t*-test to compare each BI-1347 concentration group with the CTL group (BI-1347 concentration = 0  $\mu\text{M}$ ). \*  $P < 0.05$ , \*\*  $P < 0.01$ , \*\*\*  $P < 0.001$ , \*\*\*\*  $P < 0.0001$ ; ns, not significant.

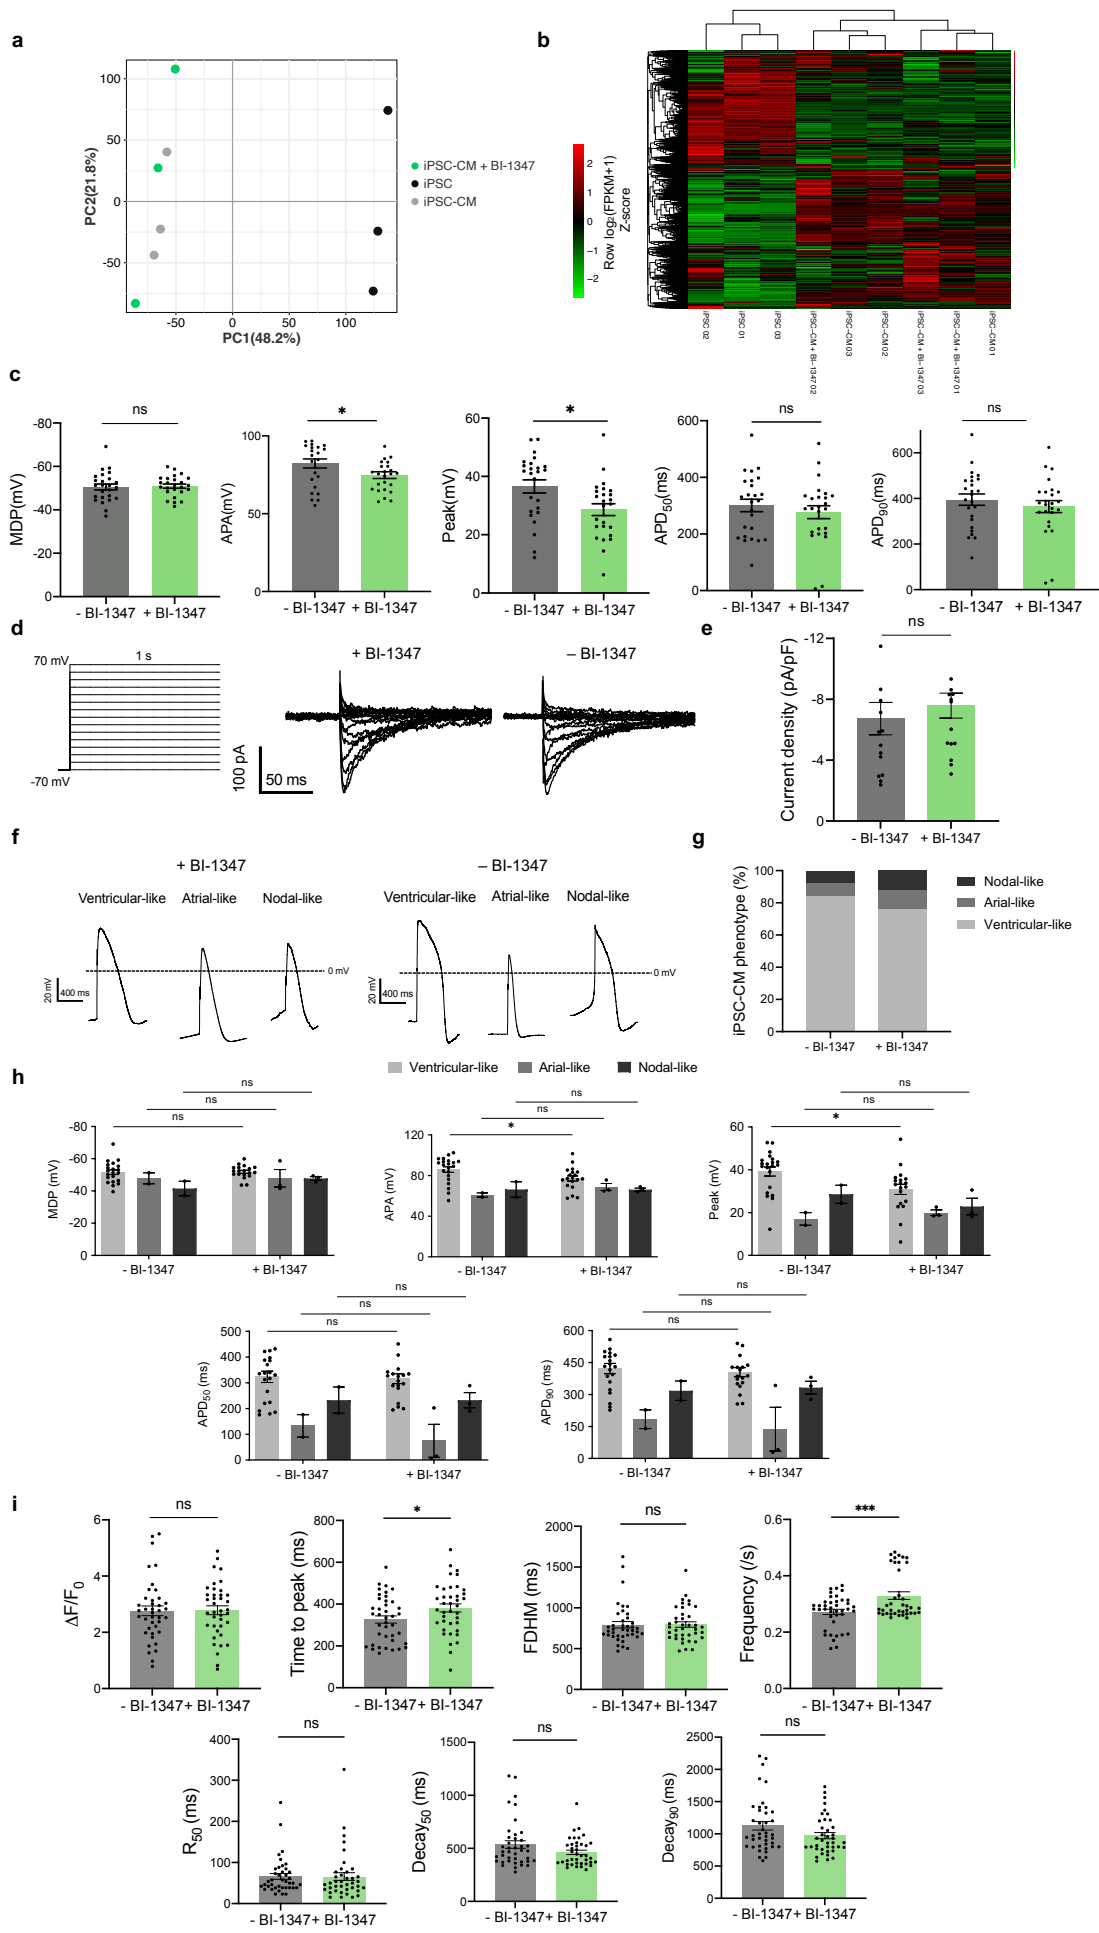

**Supplementary Fig. S13 Characteristics of iPSC-CM treated with BI-1347.**

**a** PCA of bulk RNA-seq for iPSC, iPSC-CM - BI-1347, and iPSC-CM + BI-1347 (0.5  $\mu$ M, 48 h) groups. Each point represents an RNA-seq sample.  $n = 3$ .

**b** Genome-wide comparison among iPSC, iPSC-CM, and BI-1347 treated (0–48 h) iPSC-CM without metabolic purification. Heatmap shows Z-scores of  $\log_2(\text{FPKM}+1)$  normalized over multiple samples. Hierarchical clustering was performed with 19,999 genes.

**c** Maximum diastolic potential (MDP), peak voltage, action potential amplitude (APA), and action potential duration (APD) at different levels of repolarization (90% and 50%) were compared between the + BI-1347 group ( $n = 25$  cells) and the - BI-1347 group ( $n = 25$  cells). Data were expressed as mean  $\pm$  SEM. \*  $P < 0.05$ ; ns, not significant, determined by  $t$ -test.

**d** The protocol and representative calcium current recordings of voltage-clamp.

**e** Calcium current density of iPSC-CMs at -10 mV. Data were expressed as mean  $\pm$  SEM. ns, not significant, determined by  $t$ -test.

**f** Representative action potential recordings of three iPSC-CM subtypes in + BI-1347 ( $n = 25$  cells) and - BI-1347 ( $n = 25$  cells) groups.

**g** Proportions of iPSC-CM subtypes.

**h** Maximum diastolic potential (MDP), peak voltage, action potential amplitude (APA), and action potential duration (APD) at different levels of repolarization (90% and 50%) were compared among the + BI-1347 ventricular-like group ( $n = 19$  cells), the - BI-1347 ventricular-like group ( $n = 21$  cells), the + BI-1347 atrial-like group ( $n = 3$  cells), the - BI-1347 atrial-like group ( $n = 2$  cells), the + BI-1347 nodal-like group ( $n = 3$  cells), and the - BI-1347 nodal-like groups ( $n = 2$  cells). Data were expressed as mean  $\pm$  SEM. \*  $P < 0.05$  and ns, not significant, determined by  $t$ -test.

**i**  $\Delta F/F_0$ , time to peak, FDHM, frequency, time to 50% peak ( $R_{50}$ ), time of Decay 50% ( $\text{Decay}_{50}$ ), and time of Decay 90% ( $\text{Decay}_{90}$ ) were compared between the + BI-1347 group ( $n = 39$ ) and the - BI-1347 group ( $n = 40$ ). Data were expressed as mean  $\pm$  SEM. \*  $P < 0.05$ , \*\*\*  $P < 0.001$ , and ns, not significant, determined by  $t$ -test.



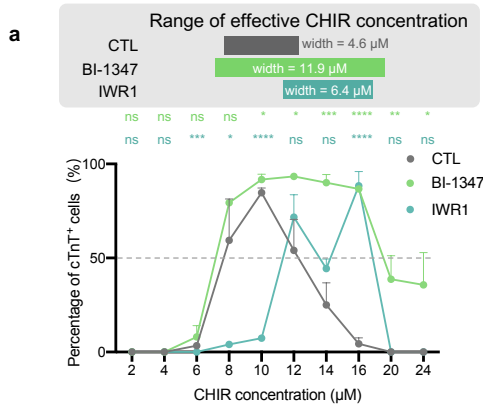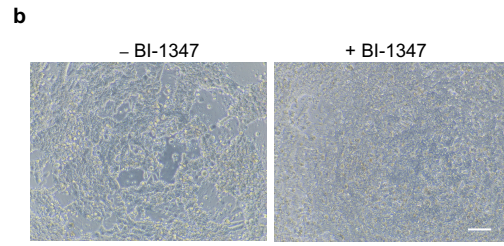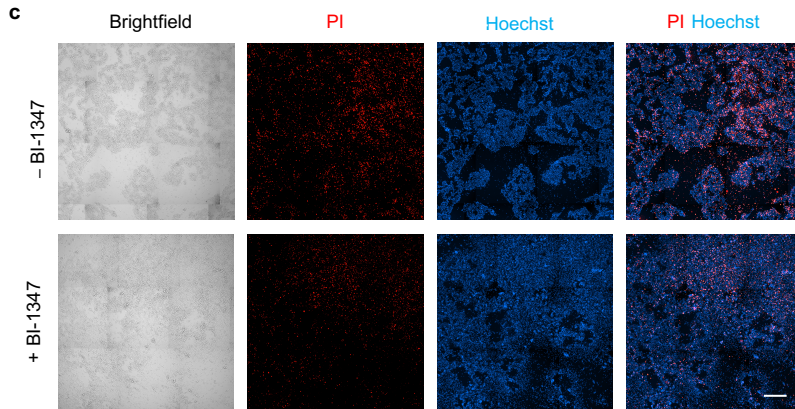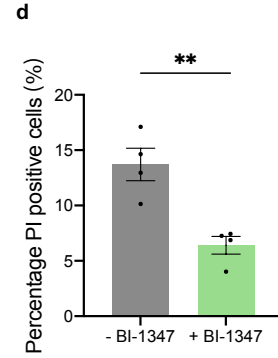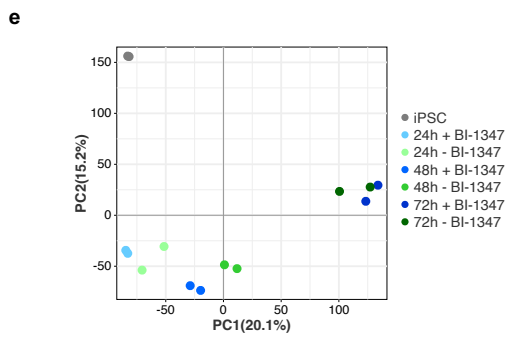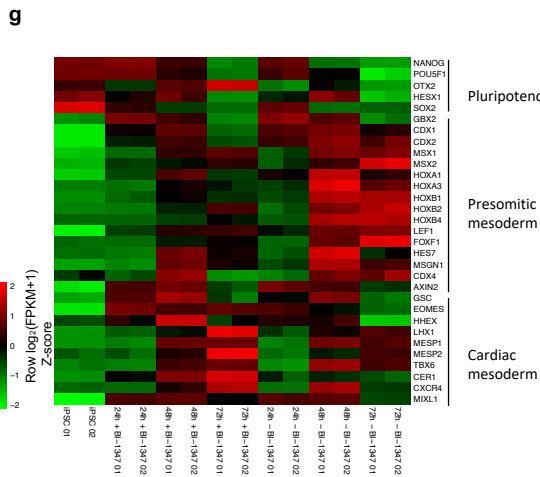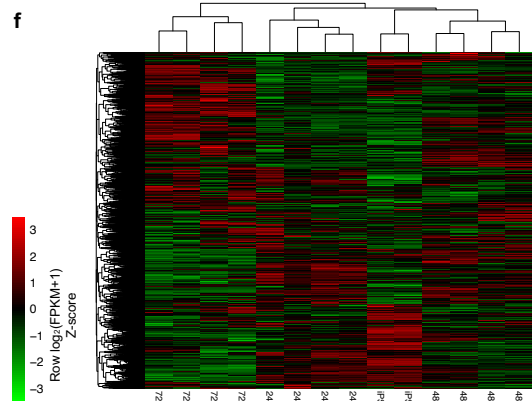

**Supplementary Fig. S14 Effect of BI-1347 on inhibiting presomitic mesoderm and cell death under high CHIR dose.**

**a** Effect of BI-1347 and IWR1 (a Wnt inhibitor) on differentiation efficiency in a wide range of CHIR concentrations. BI-1347 (0.5  $\mu$ M, 48 h) or IWR1 (2  $\mu$ M, 48 h) was added under different CHIR doses (from 4 to 24  $\mu$ M, 48 h). The widths of effective CHIR concentration (percentage of cTnT+ cells  $\geq$  50%, indicates by a dash line) were shown in the upper panel. Data are mean  $\pm$  SD.  $n = 3$ . Statistical significance was determined by *t*-test to compare the BI-1347 and IWR1 groups with the CTL group under each CHIR concentration. \*  $P < 0.05$ , \*\*  $P < 0.01$ , \*\*\*  $P < 0.001$ , \*\*\*\*  $P < 0.0001$ ; ns, not significant.

**b** Live-cell bright-field images at 48 h after CHIR treatment (12  $\mu$ M, 48 h) with or without BI-1347 (0.5  $\mu$ M, 48 h) treatment. Scare bar, 100  $\mu$ m.

**c** Representative Hoechst / PI staining result for (a). Scare bar, 500  $\mu$ m.

**d** Quantitative analysis of PI staining for (b). Data are mean  $\pm$  SD.  $n = 4$ . Statistical significance was determined by *t*-test, \*\*  $P < 0.01$ .

**e** PCA of bulk RNA-seq for iPSC treated with or without BI-1347 (0.5  $\mu$ M, 48 h) under the overdose CHIR (16  $\mu$ M, 48 h). Samples were collected at different time points of stage I. Each point represents an RNA-seq sample.  $n = 3$ .

**f** Genome-wide comparison among the samples in (e). Heatmap shows Z-scores of  $\log_2(\text{FPKM}+1)$  normalized over multiple samples. Hierarchical clustering was performed with 19,999 genes.

**g** Mesodermal fate divergence under treatment with or without BI-1347 under the overdose CHIR (16  $\mu$ M, 48 h) revealed by RNA-seq. Heatmap shows Z-scores of  $\log_2(\text{FPKM}+1)$  normalized over multiple samples.

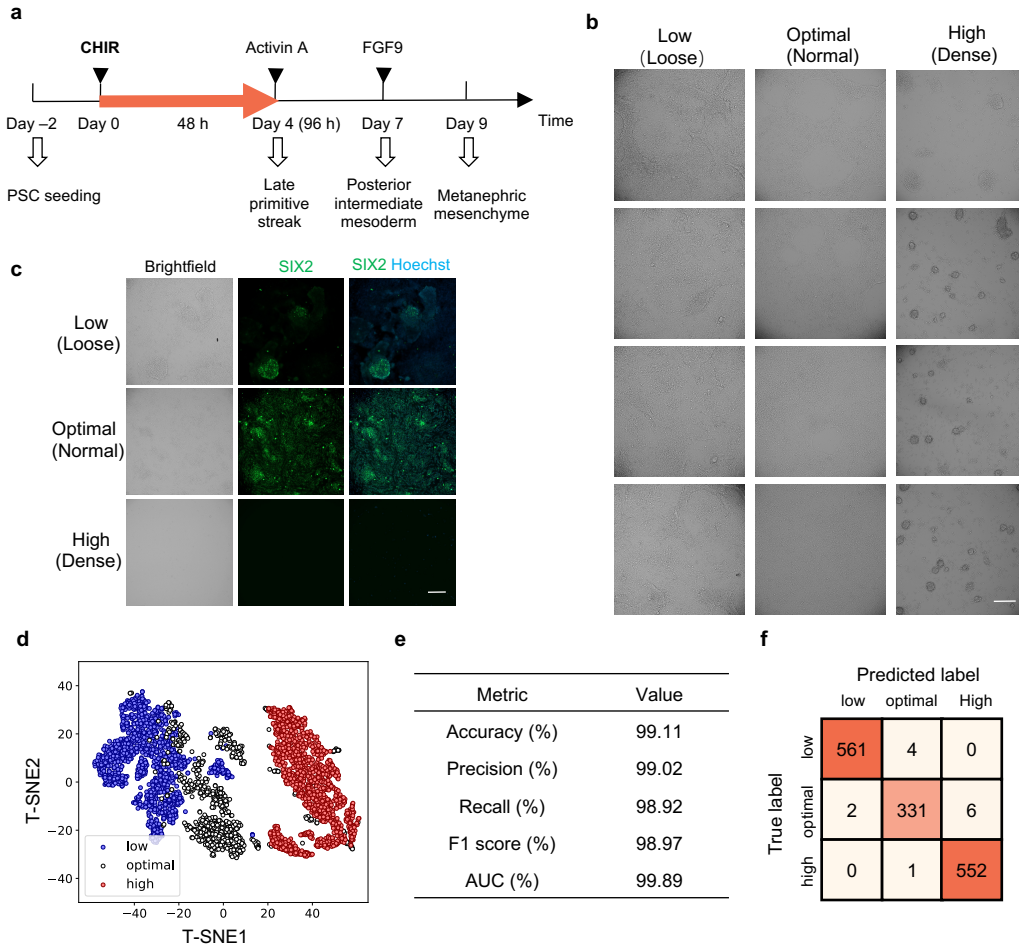

**Supplementary Fig. S15 Early assessment of CHIR concentration in early nephric differentiation by ML.**

**a** Schematic of PSC-to-NPC differentiation with CHIR as inducer. The red arrow indicates that different concentrations of CHIR used on day 0-4 could lead to different differentiation results. NPCs were collected on day 9 for SIX2 immunofluorescent staining.

**b** Typical bright-field images of day 4 cells under the treatment of low, optimal, and high CHIR concentrations. Scale bar, 200  $\mu$ m.

**c** Representative SIX2 immunofluorescent images of NPCs under low, optimal, and high CHIR concentrations on day 9. Scale bar, 200  $\mu$ m.

**d** T-SNE of the local features of day 4 bright-field images on the training set.  $n = 3398$ .

**e** Classification performance of the logistic regression model on the test set. Precision, recall, F1-score, and AUC were macro-averaged over the low, optimal, and high groups.  $n = 1457$ .

**f** Confusion matrix of the logistic regression model on the test set.  $n = 1457$ .

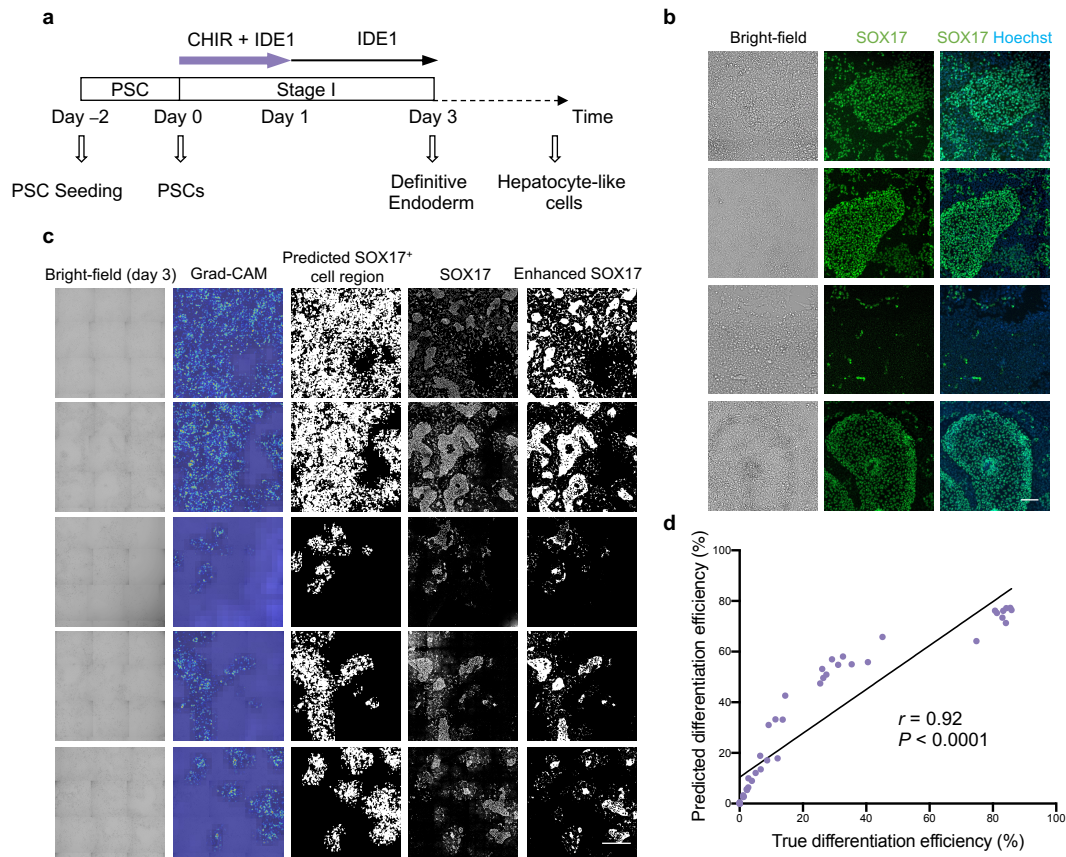

**Supplementary Fig. S16 DE recognition for early hepatic differentiation by ML.**

**a** Schematic of PSC-to-DE differentiation using small molecular for hepatocyte-like cell induction. DEs were collected on day 3 for SOX17 immunofluorescent staining.

**b** Representative Immunofluorescent results of SOX17 (green) and Hoechst (blue) for DE on day 3. Images with different final efficiencies (proportion of the SOX17<sup>+</sup> region) were chosen. Scale bar, 100  $\mu$ m.

**c** Typical predicted results of DE recognition on bright-field images from the test set. Each column from left to right represents: live-cell bright-field image on day 3; Grad-CAM heatmap for endoderm cell localization; binary prediction for localization of SOX17<sup>+</sup> endoderm cell; true SOX17 fluorescence result of day 3; Enhanced fluorescence SOX17 images by binarization and morphological operations. Scale bar, 1 mm.

**d** Correlation between the true differentiation efficiency (from day 3 SOX17 fluorescence results) and the predicted differentiation efficiency (from day 3 bright-field images), with Pearson's  $r$  value.  $n = 45$  images.

**Supplementary Table S1** The dataset configuration of pix2pix model for PSC-CM recognition.

| Batch No. | Cell lines | Medium   | Day 0<br>iPSC/ESC<br>Confluence | CHIR dose                   |                   | Training data<br>(wells) | Test data<br>(wells) | Image size per well<br>after preprocessing<br>(pixels) | Training<br>patch size<br>(pixels) |
|-----------|------------|----------|---------------------------------|-----------------------------|-------------------|--------------------------|----------------------|--------------------------------------------------------|------------------------------------|
|           |            |          |                                 | Concentration<br>( $\mu$ M) | Duration<br>(h)   |                          |                      |                                                        |                                    |
| CD03-1    | iPS-18     | RPMI+S12 | ~85%                            | 2 4 6 8 10 12               | 18 24 30 36 42 48 | 9                        | 7                    |                                                        |                                    |
| CD03-2    | H9         | RPMI+B27 | ~85%                            | 2 4 6 8 10 12               | 18 24 30 36 42 54 | 5                        | 4                    |                                                        |                                    |
| CD03-3    | iPS-18     | RPMI+B27 | ~85%                            | 2 4 6 8 10 12               | 24 48             | 3                        | 6                    |                                                        |                                    |
| CD03-4    | iPS-18     | RPMI+B27 | ~40–95%                         | 4 6 8 10                    | 24 30 36 42 48 54 | 10                       | 13                   |                                                        |                                    |
| CD03-5    | iPS-B1 H9  | RPMI+B27 | ~70%                            | 6 8 10 12 14 16             | 24 48             | 2                        | 1                    | 1536 $\times$ 1536                                     | 256 $\times$ 256                   |
| CD03-6    | iPS-18     | RPMI+B27 | ~85%                            | 4 8 12                      | 24 36 48          | 6                        | 5                    |                                                        |                                    |
| CD03-7    | iPS-F      | RPMI+B27 | ~85%                            | 4 6 8 10 12                 | 48                |                          | 31                   |                                                        |                                    |
| CD03-8    | iPS-M      | RPMI+B27 | ~85%                            | 4 6 8 10 12                 | 48                |                          | 12                   |                                                        |                                    |
| CD03-9    | WIBR3      | RPMI+B27 | ~85%                            | 4 6 8 10 12                 | 48                |                          | 19                   |                                                        |                                    |

71 wells (from batch CD03-1 to CD03-6) were randomly divided into a training set ( $n = 35$  wells) and a test set ( $n = 36$  wells). 62 wells (from batch CD03-7 to CD03-9) from three additional cell lines were used for testing the trained model’s generalization ability to new cell lines.

**Supplementary Table S2** The dataset configuration of weakly supervised learning for PSC-CPC recognition.

| Batch No. | Cell lines | Medium   | CHIR dose                |                   | Day 0 iPSC/ESC Confluence | Training data |                  |                  | Test data |                  |                  | Image size per well after preprocessing (pixels) | Patch size (pixels) |                  |
|-----------|------------|----------|--------------------------|-------------------|---------------------------|---------------|------------------|------------------|-----------|------------------|------------------|--------------------------------------------------|---------------------|------------------|
|           |            |          | Concentration ( $\mu$ M) | Duration (h)      |                           | wells         | Negative patches | Positive patches | wells     | Negative patches | Positive patches |                                                  |                     | uncertain label  |
| CD02-1    | iPS-18     | RPMI+S12 | 2 4 6 8 10 12            | 18 24 30 36 42 48 | ~85%                      | 23            | 961              | 760              | 6         | 187              | 863              | 1116                                             |                     |                  |
| CD02-2    | iPS-18     | RPMI+B27 | 4 6 8 10                 | 24 30 36 42 48 54 | ~40-95%                   | 46            | 1798             | 1615             | 17        | 1790             | 2382             | 1965                                             |                     |                  |
| CD02-3    | iPS-18     | RPMI+B27 | 2 4 6 8 10 12            | 24 48             | ~85%                      | 7             | 22               | 625              | 2         | 83               | 547              | 92                                               |                     |                  |
| CD02-4    | H9         | RPMI+B27 | 2 4 6 8 10 12            | 18 24 30 36 42 54 | ~85%                      | 15            | 342              | 908              | 4         | 181              | 1013             | 250                                              |                     |                  |
| CD02-5    | iPS-B1 H9  | RPMI+B27 | 6 8 10 12 14 16          | 24 48             | ~70%                      | 12            | 52               | 1101             | 4         | 0                | 1395             | 49                                               | 2816 $\times$ 2816  | 512 $\times$ 512 |
| CD02-6    | iPS-B1     | RPMI+B27 | 4 6 8 10                 | 24 48             | ~85%                      | 3             | 0                | 279              | 2         | 26               | 639              | 57                                               |                     |                  |
| CD02-7    | WIBR3      | RPMI+B27 | 4 6 8 10 12              | 48                | ~85%                      |               |                  |                  |           |                  |                  |                                                  | 19                  |                  |
| CD02-8    | iPS-F      | RPMI+B27 | 4 6 8 10 12              | 48                | ~85%                      |               |                  |                  |           |                  |                  |                                                  | 66                  |                  |
| CD02-9    | iPS-M      | RPMI+B27 | 4 6 8 10 12              | 48                | ~85%                      |               |                  |                  |           |                  |                  |                                                  | 41                  |                  |

126 wells (from batch CD02-1 to CD02-6) were randomly divided into a training set ( $n = 106$  wells) and a test set ( $n = 35$  wells). The number of negative patches, positive patches, and uncertain patches was derived from the manually labeled CPC segmentation masks (see Methods). 126 wells (from batch CD02-7 to CD02-9) from three additional cell lines were used for testing the trained model's generalization ability to new cell lines. Manually labeled CPC segmentation masks were not available for batch CD02-7, CD02-8, and CD02-9.

**Supplementary Table S3** The dataset configuration of ML for early assessment of CHIR doses.

| Batch No. | Cell lines | Medium   | Day 0 iPSC/ESC Confluence | CHIR duration (h)                              | 24  |      |      |      |      | 36   |     |      |      |      | 48   |      |     |      |      | Training data (wells) | Test data (wells) | Image size per well after preprocessing (pixels) |    |    |             |
|-----------|------------|----------|---------------------------|------------------------------------------------|-----|------|------|------|------|------|-----|------|------|------|------|------|-----|------|------|-----------------------|-------------------|--------------------------------------------------|----|----|-------------|
|           |            |          |                           | CHIR concentration ( $\mu\text{M}$ )           | 2   | 4    | 6    | 8    | 10   | 12   | 2   | 4    | 6    | 8    | 10   | 12   | 2   | 4    | 6    |                       |                   |                                                  | 8  | 10 | 12          |
| CD01-1    | iPS-18     | RPMI+B27 | ~40–95%                   |                                                | -   | 7.8  | 45.0 | 40.3 | 6.8  | -    | -   | 47.5 | 83.8 | 10.5 | 0.3  | -    | -   | 37.5 | 82.5 | 0.8                   | 0.5               | -                                                | 66 | 30 |             |
| CD01-2    | iPS-B1     | RPMI+B27 | ~50–70%                   | Mean percentage of cTnT <sup>+</sup> cells (%) | -   | 74.9 | 60.0 | 56.3 | 38.4 | -    | -   | 75.0 | 46.9 | 23.1 | 16.6 | -    | -   | 45.0 | 8.3  | 5.0                   | 0.6               | -                                                | 61 | 35 | 4860 × 4860 |
| CD01-3    | H9         | RPMI+B27 | ~85%                      |                                                | 0.0 | 2.0  | 85.0 | 81.3 | 27.5 | 8.8  | 0.5 | 0.5  | 71.5 | 89.0 | 17.5 | 17.5 | 0.0 | 0.0  | 85.0 | 90.0                  | 60.0              | 20.0                                             | 68 | 28 |             |
| CD01-4    | iPS-B1     | RPMI+B27 | ~60–95%                   |                                                | 0.0 | 30.0 | 93.0 | 96.0 | 91.2 | 93.2 | 0.0 | 72.5 | 95.0 | 91.3 | 90.8 | 85.8 | 0.3 | 94.7 | 92.5 | 96.0                  | 42.3              | 9.2                                              | 73 | 23 |             |

384 wells (from batch CD01-1 to CD01-4) were randomly divided into a training set ( $n = 268$  wells) and a test set ( $n = 116$  wells). For each batch, CHIR concentrations with a mean percentage of cTnT<sup>+</sup> cells  $\geq 20\%$  were labeled as optimal, while concentrations out of the optimal concentration range were labeled as low or high.

**Supplementary Table S4** The dataset configuration of ML for control of the initial PSC colony states.

| Batch No. | Cell lines | Medium   | CHIR dose                     |                   | Training data (wells) | Test data (wells) | Image size per well after preprocessing (pixels) |
|-----------|------------|----------|-------------------------------|-------------------|-----------------------|-------------------|--------------------------------------------------|
|           |            |          | CHIR concentration ( $\mu$ M) | CHIR duration (h) |                       |                   |                                                  |
| CD00-1    | iPS-B1     | RPMI+B27 | 10                            | 24                | 133                   | 57                | 2151 $\times$ 2151                               |
| CD00-2    | H9         | RPMI+B27 | 6, 8                          | 48                | 133                   | 57                |                                                  |
| CD00-3    | iPS-B1     | RPMI+B27 | 16, 20                        | 48                | 247                   | 106               |                                                  |
| CD00-4    | iPS-B1     | RPMI+B27 | 10, 12                        | 48                | 131                   | 57                |                                                  |
| CD00-5    | WIBR3      | RPMI+B27 | 12, 14                        | 48                | 134                   | 58                |                                                  |
| CD00-6    | H9         | RPMI+B27 | 12, 14                        | 48                | 132                   | 57                | 2231 $\times$ 2231                               |
| CD00-7    | iPS-F      | RPMI+B27 | 6, 8                          | 48                | 131                   | 57                |                                                  |
| CD00-8    | iPS-M      | RPMI+B27 | 6                             | 48                | 44                    | 20                |                                                  |
| CD00-9    | iPS-18     | RPMI+B27 | 8, 10                         | 48                | 132                   | 57                |                                                  |
| CD00-10   | iPS-B1     | RPMI+B27 | 6                             | 48                | 133                   | 58                |                                                  |

1934 wells (from batch CD00-1 to CD00-10) were randomly divided into a training set ( $n = 1350$  wells) and a test set ( $n = 584$  wells). To study the relationship between PSC colony morphology and the induction capacity, a wide range of duration of PSC stage ( $\sim 2$ – $5$ d) and day 0 confluence ( $\sim 20$ – $100\%$ ) were intentionally introduced.



## Supplementary Table S5 Antibody list for immunofluorescence.

| Antibody                                                   | Dilution | Company                  | Catalog Number |
|------------------------------------------------------------|----------|--------------------------|----------------|
| Rabbit polyclonal IgG anti-Mef2C                           | 1:100    | Thermo                   | PA5-82195      |
| Rabbit polyclonal IgG anti-Islet1                          | 1:500    | Abcam                    | ab20670        |
| Mouse monoclonal IgG1 anti-Mesp1                           | 1:500    | Novus Biologicals        | NBP1-51613     |
| Goat polyclonal IgG anti-cTnI                              | 1:100    | Abcam                    | ab56357        |
| Sheep polyclonal IgG anti-Mef2c                            | 1:100    | R&D Systems              | AF6786         |
| Rabbit polyclonal IgG anti-Nkx2.5                          | 1:200    | Abcam                    | ab97355        |
| Goat polyclonal IgG anti-Hand2                             | 1:100    | Novas;R&D                | AF3876         |
| Mouse monoclonal IgG2ak anti-GATA-4                        | 1:100    | Santa Cruz Biotechnology | sc-25310       |
| Mouse monoclonal IgG1 anti-cTnT                            | 1:300    | Thermo                   | MA5-12960      |
| Rabbit polyclonal IgG anti-SIX2                            | 1:200    | Proteintech              | 11562-1-AP     |
| Goat polyclonal IgG anti-SOX17                             | 1:500    | R&D Systems              | AF1924         |
| Rhodamine (TRITC) AffiniPure Donkey Anti-Rabbit IgG (H+L)  | 1:100    | Jackson ImmunoResearch   | 711-025-152    |
| Fluorescein (FITC) AffiniPure Donkey Anti-Rabbit IgG (H+L) | 1:100    | Jackson ImmunoResearch   | 711-095-152    |
| Fluorescein (FITC) AffiniPure Donkey Anti-Goat IgG (H+L)   | 1:100    | Jackson ImmunoResearch   | 705-095-147    |
| Rhodamine (TRITC) AffiniPure Donkey Anti-Goat IgG (H+L)    | 1:100    | Jackson ImmunoResearch   | 705-025-147    |
| Rhodamine (TRITC) AffiniPure Donkey Anti-Mouse IgG (H+L)   | 1:100    | Jackson ImmunoResearch   | 715-025-150    |
| Fluorescein (FITC) AffiniPure Donkey Anti-Mouse IgG (H+L)  | 1:100    | Jackson ImmunoResearch   | 715-095-150    |

## Supplementary Table S6 Primers for RT-PCR.

| Gene     | Forward primer           | Reverse primer           |
|----------|--------------------------|--------------------------|
| cTNT     | ACAGAGCGAAAAGTGGGAAG     | TCGTTGATCCTGTTTCGGAGA    |
| Cx43     | GGTGACTGGAGCGCCTTAG      | GCGCACATGAGAGATTGGGA     |
| MYH6     | GATAGAGAGACTCCTGCGGC     | CCGTCTCCCATCTCGGTT       |
| MYH7     | TCGTGCCTGATGACAAACAGGAGT | ATACTCGGTCTCGGCAGTGACTTT |
| AKAP6    | AGTTCTCCCTAAAGCTGCTGT    | TCTGCCTAGTGTAGTTGCCATT   |
| GJA5     | AGAGTGTGAAGAAGCCACG      | AACAGATGCCAAAACCTCTGCT   |
| JPH2     | ACTCTGGCTCCTGGAACCTTG    | GCGCCCTTGGTCTCTATG       |
| SLC8A1   | TCATAGCTGATCGGTTTCATGTCC | CAGTTGTCTTGGTGGTCTCTC    |
| ATPA2A   | CATCAAGCACACTGATCCCGT    | CCACTCCCATAGCTTCCCGA     |
| CACNA1C  | TGATTTCAACGCCACCAATTC    | GAGGAGTCCATAGCGGATTACT   |
| RYR2     | CATCGAACACTCCTCTACGGA    | GGACACGCTAACTAAGATGAGGT  |
| PLN      | ACCTCACTCGCTCAGCTATAA    | CATCACGATGATACAGATCAGGA  |
| TRDN     | TCACAGAAGACATAGTGACGACG  | TGGCAATAGAGCTTGCTGAAA    |
| CAV3     | GACCCCAAGAACATTAACGAGG   | GGACAACAGACGGTAGCACC     |
| BIN1     | ATGAGGCAACAAGATCGCAG     | CGTGACTTGATGTGCGGGAA     |
| AMP2     | TGAGCAGTGCCTCCAGAATTT    | CGATCTTGTTCCTCATCCC      |
| SCN5A    | AGCTGGCTGATGTGATGGTC     | CACTTGTGCCTTAGGTTGCC     |
| KIR2.1   | GTGCGAACCAACCGCTACA      | CCAGCGAATGTCCACACAC      |
| SCN1B    | TCCTGCGCTATGAGAATGAGG    | TGGTGTGTGCTCGTAGTTTC     |
| HCN1     | CATGCCACCGCTTTAATCCAG    | ATTGTAGCCACCAGTTCCGA     |
| KCNJ8    | GTGATTGCCGTCCGAAATGG     | AGTTGGTGAATAGGAACCACCT   |
| KCNH2    | CAACCTGGGCGACCAGATAG     | GGTGTGGGAGAGACGTTGC      |
| PPARGC1A | GCCTTTCTGGGTGGACTCAAGT   | GAGGGCAATCCGTCTTCATCC    |
| NPPA     | CAACGCAGACCTGATGGATTT    | AGCCCCCGCTTCTTCATTC      |
| NPPB     | TGGAAACGTCCGGTTACAG      | CTGATCCGGTCCATCTTCTC     |
| MAPK1    | TCTGGAGCAGTATTACGACCC    | CTGGCTGGAATCTAGCAGTCT    |
| PRKACA   | CAAGGAGACCGGAACCACTA     | CATTCAGGGTGTGTTTCGATCTG  |
| MYL2     | TGTCCTACCTGTCTGTTAGCCA   | ATTGGAACATGGCCTCTGGATGGA |
| MYL7     | ACATCATCACCCATGGAGACGAGA | GCAACAGAGTTTATTGAGGTGCC  |
| HCN4     | GGTGTCCATCAACAACATGG     | GCCTTGAAGAGCGCGTAG       |
| KCNQ1    | CCACCTCAACCTCATGGTG      | ACAGTGAGGGCTTCCCAAT      |
| GAPDH    | GAGTCAACGGATTTGGTCGT     | GACAAGCTTCCGTTCTCAG      |

**Supplementary Video S1** PSC derived cardiac differentiation process from day –3 to day 12.

**Supplementary Video S2** Day 6 CPCs with special texture demonstrated by image streams from day 4 to day 12.

**Supplementary Video S3** Differentiation tendency of cells located at the periphery or the center of colonies demonstrated by image streams from day 0 to day 10.

**Supplementary Video S4** Beating PSC-CM treated by BI-1347 (0.5  $\mu$ M, 0–48 h) on day 12.

**Supplementary Video S5** LSM 5 live imaging of spontaneous calcium transient in cell clusters. Left: PSC-CMs + BI-1347 group. Right: PSC-CMs – BI-1347 group. Scale bar: 20  $\mu$ m. Scan speed: 10 Hz.
